# Supplementary material for: Cardiovascular Magnetic Resonance in Patients with Cardiac Electronic Devices: Evidence from a Multicenter Study
Source: MDPI journal article supplement (doi:10.3390/jcm12206673), 2023-10-22
Supplement: s1 [file s1]

## Supplemental Material

### Supplemental Methods

Biventricular bull's eye plots were constructed with the median of segment-level artifact ratings of all patients, distinguished according to device and sequence type. Each operator assigned a score of 0-4 to each of the 17 left ventricular segments as well as to basal, mid, and apical right ventricular walls and the RV outflow tract (RVOT), where a score of 0 indicates the total absence of artifacts, while a score of 4 represents an acquisition that is entirely filled with artifacts. The medians of these segment-level ratings were calculated across all patients. For RV representation, the RVOT was conventionally represented as the outer superior layer of the RV (see *Figure S1*).

### Supplemental Figures

**Figure S1.** Representation of the regional segmentation of the LV and RV. Please note that the numbers in the LV represent the conventional 17-segment classification.

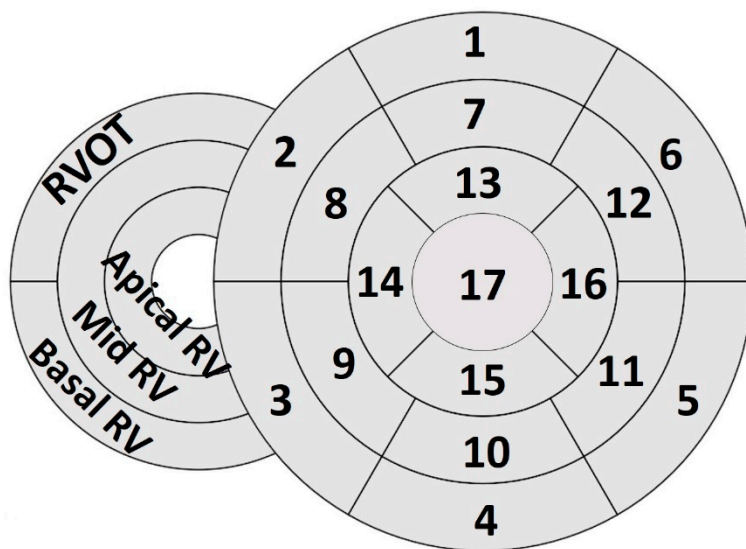

**Figure S2.** Representation of the regional segmentation of the right atrium (RA) and left atrium (LA). Please note that the grading of metal artifacts in the atrial walls was performed only from the long axis of each CMR sequence.

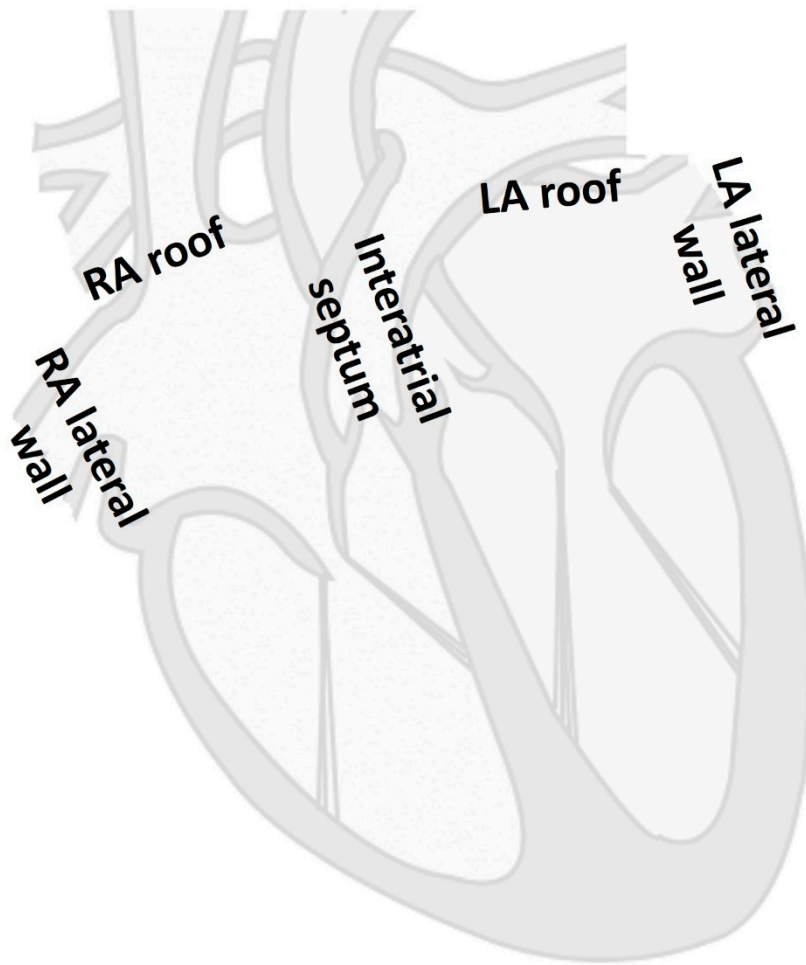

## Supplemental Tables

**Supplemental Table S1.** List of contributing centers

| Center                                                                                           | CMR scans, n (%) |
|--------------------------------------------------------------------------------------------------|------------------|
| Fondazione Toscana Gabriele Monasterio, Pisa (IT)                                                | 104 (34)         |
| Centro Cardiologico Monzino IRCCS, Milan (IT)                                                    | 68 (22)          |
| University Hospital Lausanne, CHUV, Lausanne (CH)                                                | 48 (16)          |
| IRCCS Policlinico San Donato, Milan (IT)                                                         | 42 (14)          |
| Ospedale Policlinico Casilino, Rome (IT)                                                         | 11 (4)           |
| ASST Grande Ospedale Metropolitano Niguarda, Milan (IT)                                          | 10 (3)           |
| IRCCS Humanitas Research Hospital, Rozzano, Milan (IT)                                           | 10 (3)           |
| Gabriele d'Annunzio University of Chieti-Pescara, Chieti                                         | 7 (2)            |
| Ospedale MG Vannini, Rome (IT)                                                                   | 5 (2)            |
| Department of Cardiac Thoracic and Vascular Sciences and Public Health, University of Padua (IT) | 4 (1)            |

**Supplemental Table S2.** Etiology of underlying heart disease

| Etiology                        | n  | (%) |
|---------------------------------|----|-----|
| Ischemic heart disease          | 76 | 25  |
| Conduction disease              | 51 | 17  |
| Dilated cardiomyopathy          | 41 | 13  |
| Arrhythmogenic cardiomyopathy   | 29 | 9   |
| Hypertrophic cardiomyopathy     | 24 | 8   |
| Pericarditis and/or myocarditis | 21 | 7   |
| Restrictive cardiomyopathy      | 17 | 6   |
| Adult congenital heart disease  | 14 | 5   |
| Other cardiomyopathies          | 13 | 4   |
| Valve disease                   | 10 | 3   |
| Hemochromatosis                 | 6  | 2   |
| Cardiac mass                    | 3  | 1   |
| Channelopathy                   | 2  | 1   |
| Hypertensive heart disease      | 1  | 0   |

**Supplemental Table S3.** Device characteristics

| Device type |                | n   | (%) |
|-------------|----------------|-----|-----|
| ILR         |                | 38  | 12  |
| PM          | Single chamber | 5   | 2   |
|             | Dual chamber   | 112 | 36  |
|             | Biventricular  | 3   | 1   |
|             | Leadless       | 2   | 1   |
| ICD         | Subcutaneous   | 15  | 5   |
|             | Single chamber | 46  | 15  |
|             | Dual chamber   | 70  | 22  |
|             | Biventricular  | 18  | 6   |

ICD, implantable cardioverter defibrillator; ILR, implantable loop recorder; PM, pacemaker

**Supplemental Table S4.** Median global biventricular artifact score (calculated in each patient as an average of all LV and RV segmental scores from both the short- and long-axis views of the same sequence type) according to sequence and device type.

| Sequences | Overall scans    | ICD              | PM               | ILR              |
|-----------|------------------|------------------|------------------|------------------|
|           | n= 309 (100%)    | n= 149 (48.2%)   | n= 122 (39.5%)   | n= 38 (12.3%)    |
| SSFP      | 0.32 (0.07-0.91) | 0.87 (0.50-1.46) | 0.11 (0.03-0.28) | 0.11 (0.00-0.56) |
| GRE       | 0.18 (0.02-0.59) | 0.23 (0.10-0.81) | 0.05 (0.00-0.26) | 0.15 (0.07-0.24) |
| BB-FSE    | 0.00 (0.00-0.11) | 0.05 (0.00-0.18) | 0.00 (0.00-0.00) | 0.00 (0.00-0.05) |
| STIR-FSE  | 0.05 (0.00-0.28) | 0.25 (0.12-0.51) | 0.00 (0.00-0.02) | 0.00 (0.00-0.07) |
| Perfusion | 0.02 (0.00-0.54) | 0.52 (0.00-1.02) | 0.00 (0.00-0.07) | 0.00 (0.00-0.03) |
| LGE       | 0.14 (0.02-0.55) | 0.42 (0.14-0.82) | 0.08 (0.01-0.17) | 0.00 (0.00-0.05) |

BB, black blood; FSE, fast spin echo; GRE, gradient echo; ICD, implantable cardioverter defibrillator; ILR, implantable loop recorder; LGE, late gadolinium enhancement; PM, pacemaker; SSFP, steady-state free precession; STIR, short tau inversion recovery. Data are presented as median (interquartile range).

**Supplemental Table S5.** Median global biatrial artifact score (calculated in each patient as an average of all left and right atrial walls, including the interatrial septum, from the long-axis views of the same sequence type) according to sequence and device type.

| Sequences | Overall scans    | ICD              | PM               | ILR              |
|-----------|------------------|------------------|------------------|------------------|
|           | n= 309 (100%)    | n= 149 (48.2%)   | n= 122 (39.5%)   | n= 38 (12.3%)    |
| SSFP      | 0.00 (0.00-0.40) | 0.20 (0.00-0.60) | 0.00 (0.00-0.40) | 0.00 (0.00-0.00) |
| GRE       | 0.10 (0.00-0.40) | 0.00 (0.00-0.40) | 0.20 (0.05-0.35) | 0.00 (0.00-0.00) |
| BB-FSE    | 0.00 (0.00-0.00) | 0.00 (0.00-0.00) | 0.00 (0.00-0.00) | 0.00 (0.00-0.00) |
| STIR-FSE  | 0.00 (0.00-0.00) | 0.00 (0.00-0.00) | 0.00 (0.00-0.00) | 0.00 (0.00-0.00) |
| LGE       | 0.00 (0.00-0.20) | 0.00 (0.00-0.30) | 0.00 (0.00-0.25) | 0.00 (0.00-0.00) |

BB, black blood; FSE, fast spin echo; GRE, gradient echo; ICD, implantable cardioverter defibrillator; ILR, implantable loop recorder; LGE, late gadolinium enhancement; PM, pacemaker; SSFP, steady-state free precession; STIR, short tau inversion recovery. Data are presented as median (interquartile range).

**Supplemental Table S6.** Device parameters before and after the CMR scan.

|                        | Before CMR      | After CMR       | P-value |
|------------------------|-----------------|-----------------|---------|
| Atrial lead            |                 |                 |         |
| Threshold (V)          | 0.74 (0.47)     | 0.70 (0.47)     | 0.565   |
| Duration (ms)          | 0.41 (0.04)     | 0.41 (0.11)     | 0.985   |
| Sensing (mV)           | 3.80 (2.19)     | 3.65 (2.29)     | 0.607   |
| Impedance ( $\Omega$ ) | 565.21 (265.26) | 551.44 (264.58) | 0.688   |
| Right ventricular lead |                 |                 |         |
| Threshold (V)          | 0.78 (0.40)     | 0.78 (0.39)     | 0.904   |
| Duration (ms)          | 0.42 (0.10)     | 0.42 (0.12)     | 0.969   |
| Sensing (mV)           | 12.07 (5.34)    | 12.46 (12.37)   | 0.722   |
| Impedance ( $\Omega$ ) | 514.50 (140.35) | 506.22 (144.45) | 0.598   |
| Left ventricular lead  |                 |                 |         |
| Threshold (V)          | 1.46 (1.00)     | 1.27 (1.01)     | 0.672   |
| Duration (ms)          | 0.65 (0.29)     | 0.58 (0.33)     | 0.638   |
| Sensing (mV)           | 13.24 (8.05)    | 11.27 (8.98)    | 0.713   |
| Impedance ( $\Omega$ ) | 814.58 (201.40) | 749.38 (296.40) | 0.530   |

Values are presented as mean (SD).
